# Supplementary material
Source: Springer Nature journal article supplement (https://www.springermedizin.de/resource/supplementary/12885_2011_2732_MOESM3_ESM.pdf/9461906)
Supplement: MOESM3 [file 9461906]

5,168 adult HIV patients in The Danish HIV Cohort Study seen in one of the eight centres before 1 January 2009

115 HIV patients excluded due to a diagnosis of cancer before index date

HIV: control population ratio = 1:10

5,053 HIV patients included

50,530 population controls included

5,053 fathers of HIV patients

5,053 mothers of HIV patients

50,530 mothers of population controls

50,530 fathers of population controls

**Excluded parents of HIV patients:**

Excluded because offspring were born before 1 January 1952:

Not traceable and excluded:

Fathers and mothers of HIV infected siblings (only count once)

Excluded because the parent were not alive or did not have residency in DK after index date:

Excluded due to cancer diagnosis before index date:

**Excluded parents of population controls:**

Excluded because offspring were born before 1 January 1952:

Not traceable and excluded:

Fathers and mothers of population control siblings (only count once):

Excluded because the parent were not alive or did not have residency in DK after index date:

Excluded due to cancer diagnosis before index date:

1,047 (20.7%)

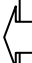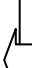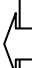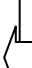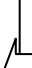

1,047 (20.7%)

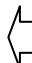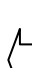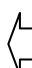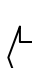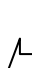

10,470 (79.3%)

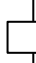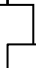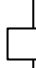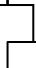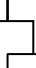

10,470 (79.3%)

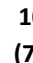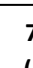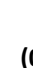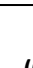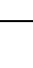

1,558 (30.8%)

1,387 (27.4%)

15 (0.3%)

17 (0.3%)

2 (<0.1%)

3 (0.1%)

3 (<0.1%)

13 (0.2%)

6,822 (13.5%)

437 (0.9%)

13 (<0.1%)

83 (1.6%)

7,589 (15.0)

446 (0.9%)

41 (0.1%)

55 (0.1%)

2,428 fathers of HIV patients included

2,586 mothers of HIV patients included

32,705 mothers of population controls included

31,929 fathers of population control included
